# Supplementary material for: Plastic-Degrading Enzymes from Marine Microorganisms and Their Potential Value in Recycling Technologies
Source: Preprints.org preprint supplement (doi:10.20944/preprints202409.0161.v1), 2024-09-03
Supplement: Supplementary file 1 [file supplementary]

## Sheet: PET_Polyethylene terephthalate
Microbial host/enzyme/gene	Enzyme type (EC number)	Enzyme activity under extreme conditions	Source	References
Pseudomonadota (Proteobacteria)
Ideonella sakaiensis 201-F6, ISPETase, ISF6_4831	PETase (EC 3.1.1.101)	No (Optimal activity at pH 9, at 40 °C)	PET-contaminated samples (sediment, soil, wastewater, and activated sludge) collected at a yard of a PET bottle-recycling factory	https://www.pazy.eu/doku.php?id=pet
Oleispira antarctica RB-8, PET5 (=Oacut)	carboxylesterase (EC 3.1.1.1)	No (Active at pH 8, at 25 °C)	Antarctic coastal seawater	https://www.pazy.eu/doku.php?id=pet
Vibrio gazogenes strain DSM-21264, PET6, BSQ33_03270	carboxylesterase (EC 3.1.1.1)	Optimal activity at pH 8-9, at 55 °C	Marine mud	https://www.pazy.eu/doku.php?id=pet
Caldimonas brevitalea, PET12 (PbCut;SbCut), AAW51_2473	carboxylesterase (EC 3.1.1.1)	No (Optimal activity at pH 8, at 30 °C)	Soil sample	https://www.pazy.eu/doku.php?id=pet
Marinobacter sp., PLE628	carboxylesterase (EC 3.1.1.1)	No (Optimal activity at 30 °C)	Marine sediment	https://www.pazy.eu/doku.php?id=pet
Marinobacter sp., PLE629	carboxylesterase (EC 3.1.1.1)	No (Optimal activity at 30 °C)	Marine sediment	https://www.pazy.eu/doku.php?id=pet
Pseudomonas oleovorans/ pseudoalcaligenes, PpCutA/PoCut	cutinase (EC 3.1.1.74)	No	Plant compost	https://www.pazy.eu/doku.php?id=pet
Pseudomonas pelagia DSM 25163, PpelaLip	cutinase (EC 3.1.1.74)	No	A culture of the green alga Pyramimonas gelidicola from the Antarctic Ocean	https://www.pazy.eu/doku.php?id=pet
Halopseudomonas aestusnigri VGXO14, PE-H, B7O88_11480	carboxylesterase (EC 3.1.1.1)	No	Intertidal sand contaminated with crude oil	https://www.pazy.eu/doku.php?id=pet
Pseudomonas mendocina ATCC 53552, PmC	triacylglycerol lipase (EC 3.1.1.3)	Optimal activity at pH 9.5, at 50 °C	Soil sample	https://www.pazy.eu/doku.php?id=pet
Pseudomonas saudimassiliensis, PsCut	carboxylesterase (EC 3.1.1.1)	No	Air samples	https://www.pazy.eu/doku.php?id=pet
Halopseudomonas bauzanensis, PbauzCut	carboxylesterase (EC 3.1.1.1)	No	Soil contaminated with hydrocarbon and heavy metal from an industrial site	https://www.pazy.eu/doku.php?id=pet
Pseudomonas alcaligenes, PaCut	carboxylesterase (EC 3.1.1.1)	No	Swimming-pool water	https://www.pazy.eu/doku.php?id=pet
Moraxella sp.TA144, lip1, Mors1	triacylglycerol lipase (EC 3.1.1.3)	Active at 5-35 °C (optimum 25 °C)	Antarctic seawater	https://www.pazy.eu/doku.php?id=pet
Pseudomonas sp., esterase MG8	carboxylesterase (EC 3.1.1.1)	Salt tolerance (up to 5M NaCl); Active at 65 °C	Human saliva metagenome	https://www.pazy.eu/doku.php?id=pet
Pseudomonas sp. strain 9.2, EstB	carboxylesterase (EC 3.1.1.1)	No	Petroleum-polluted soils	https://www.pazy.eu/doku.php?id=pet
Rhizobacter gumimpihilus NS21, RgPETase/RgCut-I	carboxylesterase (EC 3.1.1.1)	No	Soil	https://www.pazy.eu/doku.php?id=pet
Rhizobacter gumimpihilus, RgCut-II	carboxylesterase (EC 3.1.1.1)	No	Soil	https://www.pazy.eu/doku.php?id=pet
Ketobacter sp., Enzyme 403	cutinase (EC 3.1.1.74)	Optimal activity at pH 9, at 70 °C	Marine metagenome: seawater at a depth of 700 m	https://www.pazy.eu/doku.php?id=pet
Ketobacter sp., Enzyme 409	cutinase (EC 3.1.1.74)	Optimal activity at pH 9, at 60 °C	Marine metagenome: seawater at a depth of 700 m	https://www.pazy.eu/doku.php?id=pet
Ketobacter alkanivorans, Enzyme 412	cutinase (EC 3.1.1.74)	Optimal activity at pH 6, at 60 °C	Oil-contaminated coastal surface seawater	https://www.pazy.eu/doku.php?id=pet
Comamonadaceae bacterium SCN 68-20, Enzyme 406	cutinase (EC 3.1.1.74)	Optimal activity at pH 9, at 70 °C	Thiocyanate bioreactor metagenome	https://www.pazy.eu/doku.php?id=pet
Caldimonas taiwanensis+D57, CtPL (Enzyme 504)	cutinase (EC 3.1.1.74)	Optimal activity at pH 8, at 50 °C	Hot spring	https://www.pazy.eu/doku.php?id=pet
Acidovorax delafieldii BS-3, AdCut	carboxylesterase (EC 3.1.1.1)	No (Optimal activity at pH 8, at 30-40 °C)	Soil sample	https://www.pazy.eu/doku.php?id=pet
Aquabacterium parvum, ApLip-Ec		No	Drinking water biofilms	https://www.pazy.eu/doku.php?id=pet
Burkholderiales bacterium, BurPL/BbPETase	cutinase (EC 3.1.1.74)	No	Soil metagenome	https://www.pazy.eu/doku.php?id=pet
Pseudomonas sp., GlacPETase		No (Optimal activity at pH 8, at 30 °C)	Glacier metagenome	https://www.pazy.eu/doku.php?id=pet
Halopseudomonas formosensis, Hfor_PE-H		No (Optimal activity at 30-40 °C)	Soil samples obtained from a composting facility	https://www.pazy.eu/doku.php?id=pet
Pseudomonas sp. JM16B3, jmPE13		No (Optimal activity at pH 8, at 34-37 °C)	Aquaculture water	https://www.pazy.eu/doku.php?id=pet
Pseudomonas sp. JM16B3, jmPE14		No (Optimal activity at pH 8, at 30-37 °C)	Aquaculture water	https://www.pazy.eu/doku.php?id=pet
Actinomycetota
Thermobifida fusca DSM 43793, BTA-1, TfH	cutinase (EC 3.1.1.74)	Active at 55 °C	Mushroom compost	https://www.pazy.eu/doku.php?id=pet
T. fusca DSM 44342, TfH42_Cut1	cutinase (EC 3.1.1.74)	Active at 50 °C	Compost from green waste	https://www.pazy.eu/doku.php?id=pet
T. fusca (strain YX), WSH03-11, Tfu_0883	cutinase (EC 3.1.1.74)	Optimal activity at 60 °C	Compost pile	https://www.pazy.eu/doku.php?id=pet
T. fusca (strain YX), WSH03-11, Tfu_0882	cutinase (EC 3.1.1.74)	Optimal activity at 60 °C	Compost pile	https://www.pazy.eu/doku.php?id=pet
T. fusca, TfCut_1 (Cut-1.kw3) (only active on 3PET; not on higher polymers!)	PETase (EC 3.1.1.101)	Active at 55-65 °C	Compost	https://www.pazy.eu/doku.php?id=pet
T. fusca, TfCut_2 (Cut-2.kw3)	cutinase (EC 3.1.1.74)	Active at 55-65 °C	Compost	https://www.pazy.eu/doku.php?id=pet
T. fusca NRRL B-8184, Cut1	cutinase (EC 3.1.1.74)	Active at pH 6.8-9 (optimally pH 8), at 40-80 °C (optimally 55 °C). Tolerant to organic solvents and surfactants.	Soil	https://www.pazy.eu/doku.php?id=pet
T. fusca NRRL B-8184, Cut2	cutinase (EC 3.1.1.74)	Active at pH 6.8-9 (optimally pH 8), at 40-80 °C (optimally 55 °C). Tolerant to organic solvents and surfactants.	Soil	https://www.pazy.eu/doku.php?id=pet
T. fusca, Enzyme 701	PETase (EC 3.1.1.101)	Optimal activity at pH 7.5, at 60 °C	Soil	https://www.pazy.eu/doku.php?id=pet
T. fusca, Enzyme 702	PETase (EC 3.1.1.101)	Optimal activity at pH 6, at 50 °C	Soil	https://www.pazy.eu/doku.php?id=pet
T. cellulosilytica DSM44535, Thc_Cut1	cutinase (EC 3.1.1.74)	Active at 50 °C	Overheated manure compost	https://www.pazy.eu/doku.php?id=pet
T. cellulosilytica DSM44535, Thc_Cut2	cutinase (EC 3.1.1.74)	Active at 50 °C	Overheated manure compost	https://www.pazy.eu/doku.php?id=pet
T. cellulosilytica, Enzyme 711	PETase (EC 3.1.1.101)	No (Optimal activity at pH 7, at 30 °C)	Overheated manure compost	https://www.pazy.eu/doku.php?id=pet
T. curvata DSM43183, Tcur_1278	cutinase (EC 3.1.1.74)	Active at 50-60 °C	Straw	https://www.pazy.eu/doku.php?id=pet
T. curvata DSM43183, Tcur0390	cutinase (EC 3.1.1.74)	Active at 50 °C	Straw	https://www.pazy.eu/doku.php?id=pet
T. halotolerans DSM44931, Thh_Est	carboxylesterase (EC 3.1.1.1)	Active at 50 °C	Salt well	https://www.pazy.eu/doku.php?id=pet
T. alba (AHK119), Est1 (Hydrolase 4); Enzyme 708	PETase (EC 3.1.1.101)	No (Optimal activity at pH 7, at 40 °C)	Composted polyester films	https://www.pazy.eu/doku.php?id=pet
T. alba DSM43185, Tha_Cut1, cut1	cutinase (EC 3.1.1.74)	Active at 50 °C	Soil	https://www.pazy.eu/doku.php?id=pet
T. alba AHK119, Est119, est2	carboxylesterase (EC 3.1.1.1)	Optimal activity at 45-55 °C	Composted polyester films	https://www.pazy.eu/doku.php?id=pet
Saccharomonospora (Thermoactinomyces) viridis AHK190, Cut190	cutinase (EC 3.1.1.74)	Active at 50-65 °C	Compost	https://www.pazy.eu/doku.php?id=pet
Actinobacteria bacterium OK074, Enzyme 405	PETase (EC 3.1.1.101)	Optimal activity at pH 9, at 70 °C	Endosphere of plant Populus trichocarpa	https://www.pazy.eu/doku.php?id=pet
Allorhizocola rhizosphaerae, Enzyme 407	PETase (EC 3.1.1.101)	Optimal activity at pH 9, at 50 °C	Rhizosphere soil	https://www.pazy.eu/doku.php?id=pet
Nocardioidaceae bacterium, Enzyme 503	PETase (EC 3.1.1.101)	No (Optimal activity at pH 9, at 30 °C)	Unknown origin (by-product of the genome assembly process during the sequencing of a genome of the fungus Coccidioides)	https://www.pazy.eu/doku.php?id=pet
Marinactinospora thermotolerans, MtCut / Enzyme 606	PETase (EC 3.1.1.101)	Enzyme 606: optimal activity at pH 9, at 60 °C; MtCut: optimal activity at pH 8, at 35 °C	Deep-sea sediment at about 3865 m depth	https://www.pazy.eu/doku.php?id=pet
Actinobacteria bacterium OV320, Enzyme 607	PETase (EC 3.1.1.101)	Optimal activity at pH 8, at 50 °C	Endosphere of plant Populus trichocarpa	https://www.pazy.eu/doku.php?id=pet
Saccharopolyspora flava, Enzyme 611	PETase (EC 3.1.1.101)	Optimal activity at pH 6, at 50 °C	Soil	https://www.pazy.eu/doku.php?id=pet
Rhodococcus sp. RosL12, Rcut (PBATh), OL660765	cutinase (EC 3.1.1.74)	Active at pH 7-11 (optimally pH 9), at 0-50 °C (optimally 40 °C); High stability in organic solvents	Antarctic Ross Sea	https://www.pazy.eu/doku.php?id=pet
Streptomyces scabiei, Sub1		Active at 37-50 °C	Common scab lesion on a potato tuber	https://www.pazy.eu/doku.php?id=pet
Streptomyces sp. SM14, SM14est		Salt tolerance (0-1M NaCl); Active at pH 8.5, at 10-45 °C (optimally at 45 °C)	Isolated from the sponge Haliclona simulans at a depth of 15 m in Kilkieran Bay, Galway, Ireland	https://www.pazy.eu/doku.php?id=pet
Compost metagenome (Actinomadura hallensis), PHL-1		Active at 50 °C	Plant waste compost (metagenome)	https://www.pazy.eu/doku.php?id=pet
Compost metagenome (Actinomadura sp.), PHL-2		Active at 50 °C	Plant waste compost (metagenome)	https://www.pazy.eu/doku.php?id=pet
Amycolatopsis bacterium, PET40		Active at pH 4-10 (optimally pH 8), at 4-65 °C (optimally 40 °C); Stable in the presence of 5% SDS	Soil metagenome	https://www.pazy.eu/doku.php?id=pet
Microbispora sp., SIBER-1		Active at pH 6-8, at 25-50 °C	Soil	https://www.pazy.eu/doku.php?id=pet
Bacillota
Bacillus subtilis 4P3-11m, BsEstB	carboxylesterase (EC 3.1.1.1)	No (Optimal activity at pH 7, at 40 °C)	Not specified	https://www.pazy.eu/doku.php?id=pet
Thermoanaerobacter sp. , PHL-7 (PES-H1; PES-H2)	cutinase (EC 3.1.1.74)	Active at 50-85 °C (optimally at 75-80 °C)	Plant compost	https://www.pazy.eu/doku.php?id=pet
Compost metagenome, PHL-31		Active up to 80 °C	Plant compost	https://www.pazy.eu/doku.php?id=pet
Clostridium botulinum ATCC3502, Cbotu_EstA2		Optimal activity at 50 °C	Soil	https://www.pazy.eu/doku.php?id=pet
Cryptosporangium aurantiacum, CaPETase	cutinase (EC 3.1.1.74)	Active at 30-60 °C	Lake mud	https://www.pazy.eu/doku.php?id=pet
Bacillus thermoamylovorans, Lip4_120		Active at 30-80 °C (optimally at 40 °C)	Biofilm of PET waste in hot springs	https://www.pazy.eu/doku.php?id=pet
Bacillus thermoamylovorans, Est8_89		Active at 30-80 °C (optimally at 50 °C)	Biofilm of PET waste in hot springs	https://www.pazy.eu/doku.php?id=pet
Bacillus thermoamylovorans, Est11_32		Active at 30-80 °C (optimally at 40 °C)	Biofilm of PET waste in hot springs	https://www.pazy.eu/doku.php?id=pet
Bacillus thermoamylovorans, Est18_23		Active at 30-80 °C (optimally at 50 °C)	Biofilm of PET waste in hot springs	https://www.pazy.eu/doku.php?id=pet
Bacillus thermoamylovorans, Ces19_14		Active at 30-80 °C (optimally at 40 °C)	Biofilm of PET waste in hot springs	https://www.pazy.eu/doku.php?id=pet
Bacillus thermoamylovorans, Ces39_5		Active at 30-80 °C (optimally at 50 °C)	Biofilm of PET waste in hot springs	https://www.pazy.eu/doku.php?id=pet
Holdemanella biformis, HG-2		No	Human feces	https://www.pazy.eu/doku.php?id=pet
Clostridiales bacterium AM23-16LB, HG-3		No	Human feces	https://www.pazy.eu/doku.php?id=pet
Bacteroidota
Aequorivita sp. CIP111184, PET27	carboxylesterase (EC 3.1.1.1)	Active at pH 5-10, at 10-90 °C (optimally at 40 °C)	Antarctic shallow water sediments	https://www.pazy.eu/doku.php?id=pet
Kaistella (Chryseobacterium) jeonii, PET30	carboxylesterase (EC 3.1.1.1)	Active at pH 5-10, at 4-60 °C (optimally at 30 °C)	Moss of penguin habitats (terrestrial samples)	https://www.pazy.eu/doku.php?id=pet
Chloroflexota
Chloroflexus sp. MS-G, Enzyme 202		Active at pH 6, at 70 °C	Thermal spring	https://www.pazy.eu/doku.php?id=pet
Chloroflexi bacterium, IS10		Active at pH 6-9 (optimally pH 9), at 20-90 °C (optimally at at 60-70 °C)	Hydrothermal spring	https://www.pazy.eu/doku.php?id=pet
Chloroflexi bacterium, IS12		Active at pH 6-9 (optimally pH 9), at 20-90 °C (optimally at 70-80 °C)	Hydrothermal spring	https://www.pazy.eu/doku.php?id=pet
Dehalococcoidia bacterium, IS11		Active at pH 6-9 (optimally pH 9), at 20-90 °C (optimally at 70-90 °C)	Hydrothermal spring	https://www.pazy.eu/doku.php?id=pet
Deinococcata
Deinococcus maricopensis DSM 21211, PET1/DmPETase	triacylglycerol lipase (EC 3.1.1.3)	Active at pH 5-9 (optimally pH 6), at 30-70 °C (optimally at 50 °C)	Soil	https://www.pazy.eu/doku.php?id=pet
Metagenome-derived without a phylogenetic affiliation
LCC, leaf compost metagenome, highly similar to HRB29 locus GBD22443	cutinase (EC 3.1.1.74)	Optimal activity at pH 8, at 50 °C	Leaf-branch compost metagenome	https://www.pazy.eu/doku.php?id=pet
BhrPETase from Bacterium HR29	cutinase (EC 3.1.1.74)	Optimal activity at 70 °C	Subsurface geothermal stream	https://www.pazy.eu/doku.php?id=pet
Metagenome-derived, no obvious affiliation, PET2, lipIAF5-2	PETase (EC 3.1.1.101)	Active at pH 8-10 (optimally pH 8-9), at 17-90 °C (optimally at 60-70 °C)	Metagenome library in gelatin degradation reactor	https://www.pazy.eu/doku.php?id=pet
Metagenome-derived. no obvious affiliation, Enzyme 101	fumonisin B1 esterase (EC 3.1.1.87)	Optimal activity at pH 9, at 70 °C	Thermal spring metagenome	https://www.pazy.eu/doku.php?id=pet
Metagenome-derived. no obvious affiliation, Enzyme 102	fumonisin B1 esterase (EC 3.1.1.87)	Optimal activity at pH 6, at 60 °C	Thermal spring metagenome	https://www.pazy.eu/doku.php?id=pet
Metagenome-derived. no obvious affiliation, Enzyme 204	acylglycerol lipase (EC 3.1.1.23)	Optimal activity at pH 8, at 70 °C	Thermal spring metagenome	https://www.pazy.eu/doku.php?id=pet
Metagenome-derived. no obvious affiliation, Enzyme 211		Optimal activity at pH 7.5, at 70 °C	Thermal spring metagenome	https://www.pazy.eu/doku.php?id=pet
Metagenome-derived. no obvious affiliation, Enzyme 214		Optimal activity at pH 9, at 50 °C	Thermal spring metagenome	https://www.pazy.eu/doku.php?id=pet
Metagenome-derived. no obvious affiliation, Enzyme 301	cutinase (EC 3.1.1.74)	Optimal activity at pH 6, at 70 °C	Thermal spring metagenome	https://www.pazy.eu/doku.php?id=pet
Metagenome-derived. no obvious affiliation, Enzyme 305	cutinase (EC 3.1.1.74)	Optimal activity at pH 6, at 70 °C	Thermal spring metagenome	https://www.pazy.eu/doku.php?id=pet
Metagenome-derived, no obvious affiliation, Enzyme 307		Optimal activity at pH 9, at 60 °C	Thermal spring metagenome	https://www.pazy.eu/doku.php?id=pet
Compost metagenome, PHL-4		Active at 45-60 °C (optimally at 55 °C)	Compost metagenome	https://www.pazy.eu/doku.php?id=pet
Compost metagenome, PHL-5		Active at 45-60 °C (optimally at 50 °C)	Compost metagenome	https://www.pazy.eu/doku.php?id=pet
Compost metagenome, PHL-6		Active at 45-60 °C (optimally at 55 °C)	Compost metagenome	https://www.pazy.eu/doku.php?id=pet
Archaea
Candidatus Bathyarchaeota archaeon, PET46	feruloyl esterase (EC 3.1.1.73)	Active at pH 5-8 (optimally at pH 7-8); optimal activity at 70 °C; solvent tolerance;	Deep-sea marine sediment metagenome	https://www.pazy.eu/doku.php?id=pet
Eukarya
Pseudozyma (Candida) antarctica, lipase B, CalB	triacylglycerol lipase (EC 3.1.1.3)	Active at 60 °C	The bottom of the antarctic lake Vanda	https://www.pazy.eu/doku.php?id=pet
Fusarium solani , FsC	cutinase (EC 3.1.1.74)	Active at 30-60 °C	Pea stem	https://www.pazy.eu/doku.php?id=pet
Fusarium oxysporum, FoCut5a	cutinase (EC 3.1.1.74)	Active at pH 5-9 (optimally pH 8), at 30-70 °C (optimally at 40 °C)	Plants	https://www.pazy.eu/doku.php?id=pet
Humicola insolens, HiC	cutinase (EC 3.1.1.74)	Active at pH 6.5-9 (optimally at pH 8.5), at 30-85 °C (optimally at 80 °C)	Hot spring	https://www.pazy.eu/doku.php?id=pet
Moniliophthora roreri, MRCUT1	cutinase (EC 3.1.1.74)	Active at pH 5-9 (optimally at pH 8), at 30-50 °C (optimally at 40 °C)	Cacao pods	https://www.pazy.eu/doku.php?id=pet

## Sheet: PUR_Polyurethane
Microbial host/enzyme/gene	Enzyme type (EC number)	Enzyme activity under extreme conditions	Source	References
Actinobacteriota
LCC, leaf compost metagenome, highly similar to HRB29 locus GBD22443	cutinase (EC 3.1.1.74)	Active at 70 °C	Leaf-branch compost metagenome	https://www.pazy.eu/doku.php?id=pur
Thermobifida (Thermomonspora) fusca, TfCut_2 (Cut2-kw3)	cutinase (EC 3.1.1.74)	Active at 60 °C	Compost	https://www.pazy.eu/doku.php?id=pur
Thermobifida (Thermomonspora) curvata DSM43183, Tcur_1278	cutinase (EC 3.1.1.74)	Active at 60 °C	Straw	https://www.pazy.eu/doku.php?id=pur
Thermobifida (Thermomonspora) curvata DSM43183, Tcur0390	cutinase (EC 3.1.1.74)	Active at 60 °C	Straw	https://www.pazy.eu/doku.php?id=pur
Lysinibacillus fusiformis SCO2		No (Active at 37 °C)	Murine intestine	https://www.pazy.eu/doku.php?id=pur
Rhodococcus equi TB-60, 45 kDa urethanase, purified, no gene identified		Optimal activity at pH 5.5, at 45 °C	Soil	https://www.pazy.eu/doku.php?id=pur
Rhodococcus erythropolis CCM2595		Active at pH 4-7	Soil	https://www.pazy.eu/doku.php?id=pur
Rhodococcus erythropolis MP50		Active at pH 4-7	Soil	https://www.pazy.eu/doku.php?id=pur
Sporosarcina ureae P17a		Active at pH 4-7	Soil	https://www.pazy.eu/doku.php?id=pur
Pseudomonadota (Proteobacteria)
Comamonas (Delftia) acidovorans TB-35, PudA		No (Active at pH 6.5, at 45 °C)	Soil	https://www.pazy.eu/doku.php?id=pur
Pseudomonas chloroaphis, lipase, PueA		Stable up to 100 °C	Soil	https://www.pazy.eu/doku.php?id=pur
Pseudomonas chloroaphis, lipase, PueB		Stable up to 100 °C	Soil	https://www.pazy.eu/doku.php?id=pur
Pseudomonas fluorescens, esterase PulA		Active at pH 5	Pre-filter tanks	https://www.pazy.eu/doku.php?id=pur
Pseudomonas protegens strain Pf-5, PueA		No	Root surface of cotton	https://www.pazy.eu/doku.php?id=pur
Pseudomonas protegens strain Pf-5, PueB		No	Root surface of cotton	https://www.pazy.eu/doku.php?id=pur
Halopseudomonas formosensis, Hfor_PE-H		Active up to 50 °C	Mesophilic compost heap	https://www.pazy.eu/doku.php?id=pur
Agrobacterium tumefaciens d3, AmdA		Optimal activity at pH 7.5, at 55 °C	Soil	https://www.pazy.eu/doku.php?id=pur
Klebsiella oxytoca 1686		Active at pH 4-7	Plants	https://www.pazy.eu/doku.php?id=pur
Burkholderia phytofirmans DSM17436		Active at pH 4-7	Onion roots	https://www.pazy.eu/doku.php?id=pur
Microbacterium hydrocarbonoxydans		Active at pH 4-7	Oil contaminated soil	https://www.pazy.eu/doku.php?id=pur
Metagenome-derived, UMG-SP-1		Optimal activity at pH 10, at 70 °C	Polyurethane-contaminated soil	https://www.pazy.eu/doku.php?id=pur
Metagenome-derived, UMG-SP-2		Optimal activity at pH 10, at 70 °C	Polyurethane-contaminated soil	https://www.pazy.eu/doku.php?id=pur
Metagenome-derived, UMG-SP-3		Optimal activity at pH 10, at 35 °C	Polyurethane-contaminated soil	https://www.pazy.eu/doku.php?id=pur
Metagenome-derived without a phylogenetic affiliation
Metagenome-derived, CE_Ubrb		No (Active at pH 7, at 30 °C)	Bovine rumen microbiome	https://www.pazy.eu/doku.php?id=pur
Eukaryotic hosts
Diutina (Candida) rugosa , lipase, Lip1-Lip5 isoenzymes, purified	triacylglycerol lipase (EC 3.1.1.3)	No (Optimal activity at pH 7, at 35 °C)	Feces	https://www.pazy.eu/doku.php?id=pur
Pestalotiopsis microspora, lipase, 21 kDa hydrolase, purified, no gene identified		No	Plant stems	https://www.pazy.eu/doku.php?id=pur
Candida parapsilosis NBRC 708 (CPUTNase)		Active at pH 5.5-10 (optimally at pH 10), at 20-50 °C (optimally at 43 °C); stable in <40% ethanol solutions	Hospital environment	https://www.pazy.eu/doku.php?id=pur
Aspergillus oryzae		Active at pH 6.4-9.6 (optimally at pH 9.6), at 20-50 °C (optimally at 40 °C); stable in <40% ethanol solutions	Cereal	https://www.pazy.eu/doku.php?id=pur

## Sheet: PE_Polyethylene
Microbial host/enzyme/gene	Enzyme type (EC number)	Enzyme activity under extreme conditions	Source	References
Eukarya
Galleria mellonella, 'Demetra', arylphorin-like protein	phenol oxidase family	No (Active at room temperature)	Galleria mellonella = Class Insecta	https://www.pazy.eu/doku.php?id=pe
Galleria mellonella, 'Ceres', hexamerin	phenol oxidase family	No (Active at room temperature)	Galleria mellonella = Class Insecta	https://www.pazy.eu/doku.php?id=pe
Bacteria
Rhodococcus opacus R7, LMC02	laccase-like multicopper oxidases	Optimal activity at pH 7, at 65 °C	Hydrocarbon contaminated soil	https://www.pazy.eu/doku.php?id=pe
Rhodococcus opacus R7, LMC03	laccase-like multicopper oxidases	Optimal activity at pH 5.5, at 80 °C	Hydrocarbon contaminated soil	https://www.pazy.eu/doku.php?id=pe

## Sheet: PA_Polyamide
Microbial host/enzyme/gene	Enzyme type (EC number)	Enzyme activity under extreme conditions	Source	References
Bacteria
Pseudomonas sp. (strain NK87), NylA		No	wastewater of a factory which produces nylon-6	https://www.pazy.eu/doku.php?id=pa
Pseudomonas sp. (strain NK87), NylB		No	wastewater of a factory which produces nylon-6	https://www.pazy.eu/doku.php?id=pa
Paenarthrobacter ureafaciens (previously Arthrobacter guttatus/ Flavobacterium sp.) strain K172, NylA on plasmid pOAD1		No	Sludge	https://www.pazy.eu/doku.php?id=pa
Paenarthrobacter ureafaciens (previously Arthrobacter guttatus/ Flavobacterium sp.) strain K172, NylB on plasmid pOAD1		No	Sludge	https://www.pazy.eu/doku.php?id=pa
Paenarthrobacter ureafaciens (previously Arthrobacter guttatus/ Flavobacterium sp.) strain K172, NylC on plasmid pOAD1		No	Sludge	https://www.pazy.eu/doku.php?id=pa
Agromyces sp. KY5R, NylC		Active up to 55 °C	wastewater of a nylon-6 factory	https://www.pazy.eu/doku.php?id=pa
Kocuria sp. KY2, NylC		Active up to 60 °C	activated sludge from a sewage disposal plant	https://www.pazy.eu/doku.php?id=pa
Nocardia globerula IFO 13510, aryl acylamidase		Optimal activity at pH 9-10, at 40-50 °C	Soil	https://www.pazy.eu/doku.php?id=pa
Nocardia farcinica IFM 10512, aryl acylamidase		Active at pH 8-11, at 30-50 °C (optimally at 50 °C)	Soil	https://www.pazy.eu/doku.php?id=pa
Nocardia farcinica CGMCCC4.1166, aryl acylamidase		Active at pH 5-11 (optimally at pH 8), at 25-60 °C (optimally at 50 °C)	Soil	https://www.pazy.eu/doku.php?id=pa
Pseudoxanthomonas sp. TN-N1, hydrolase		No (Optimal activity at pH 7.5, at 35 °C)	Soil	https://www.pazy.eu/doku.php?id=pa
Thermocatellispora tengchongensis, Tt-NylC		Active at 60 °C	Sandy soil from a geothermal area	https://www.pazy.eu/doku.php?id=pa
Microbacterium sp., M-NylC		Active at 40-60 °C	Leaf; host: Arabidopsis thaliana	https://www.pazy.eu/doku.php?id=pa
Nocardiopsis composta, Nc-NylC		Active at 50 °C	Bioaerosol in the surroundings of a composting facility	https://www.pazy.eu/doku.php?id=pa
Metagenome-derived, UMG-SP-1	metagenomic amidases	Active at pH 7.5, at 40-50 °C	Polyurethane-contaminated soil	https://www.pazy.eu/doku.php?id=pa
Metagenome-derived, UMG-SP-2	metagenomic amidases	Active at pH 7.5, at 40-60 °C	Polyurethane-contaminated soil	https://www.pazy.eu/doku.php?id=pa
Metagenome-derived, UMG-SP-3	metagenomic amidases	No (Active at pH 7.5, at 40 °C)	Polyurethane-contaminated soil	https://www.pazy.eu/doku.php?id=pa
Parvibaculum sp., GatA	amidase	Active at 40-50 °C	Unspecified	https://www.pazy.eu/doku.php?id=pa
Rhodococcus sp. Oct1, OoH	ω-octalactam hydrolase	Active at pH 7-12 (optimally pH 11), at 20-50 °C (optimally at 35 °C)	Soil	https://www.pazy.eu/doku.php?id=pa
Rhodococcus equi TB-60, ReU	urethanase	No (Active at 40 °C)	Soil	https://www.pazy.eu/doku.php?id=pa
Thermocatellispora tengchongensis, TtA		No (Active at 40 °C)	Sandy soil from a geothermal area	https://www.pazy.eu/doku.php?id=pa
Eukarya
White rot fungus strain IZU-154, MnP	manganese peroxidase	Active at pH 3.5-5.5 (optimally pH 4-4.5)	Soil	https://www.pazy.eu/doku.php?id=pa
Beauveria brongniartii, Protease		No	Unspecified	https://www.pazy.eu/doku.php?id=pa

## Sheet: PLA_Polylactic acid
Microbial host/enzyme/gene	Enzyme type (EC number)	Enzyme activity under extreme conditions	Source	References
Bacteria
Actinomadura keratinilytica T16-1, serine protease	peptidases (EC 3.4.-)	Optimal activity at pH 10, at 70 °C	Soil	https://www.pazy.eu/doku.php?id=pla
Amycolatopsis sp. strain 41, protease	peptidases (EC 3.4.-)	No (Optimal activity at pH 6, at 37-45 °C)	Unspecified	https://www.pazy.eu/doku.php?id=pla
Amycolatopsis (Nocardia) orientalis, PLAse I (PLase1)	peptidases (EC 3.4.-)	Optimal activity at pH 9.5, at 60 °C	Soil	https://www.pazy.eu/doku.php?id=pla
Amycolatopsis (Nocardia) orientalis, PLAse II (PLase2)	peptidases (EC 3.4.-)	Optimal activity at pH 10.5, at 50 °C	Soil	https://www.pazy.eu/doku.php?id=pla
Amycolatopsis (Nocardia) orientalis, PLAse III (PLase3)	peptidases (EC 3.4.-)	Optimal activity at pH 9.5, at 60 °C	Soil	https://www.pazy.eu/doku.php?id=pla
Paenibacillus amylolyticus TB13, PLaA	carboxylesterase (EC 3.1.1.1)	Optimal activity at pH 10, at 45-55 °C	Soil	https://www.pazy.eu/doku.php?id=pla
Amycolatopsis (Nocardia) sp. strain K104-1	peptidases (EC 3.4.-)	Optimal activity at pH 9, at 55-60 °C	Soil	https://www.pazy.eu/doku.php?id=pla
Alcaligenes sp. , lipase PL		Optimal activity at pH 9, at 55 °C	Soil	https://www.pazy.eu/doku.php?id=pla
Comamonas acidovorans TB-35, mainly PUR active esterase	carboxylesterase (EC 3.1.1.1)	No (Active at pH 6.5, at 45 °C)	Soil	https://www.pazy.eu/doku.php?id=pla
Alcanivorax borkumensis, ABO2449, esterase	carboxylesterase (EC 3.1.1.1)	Active at pH 7-11 (optimally at pH 9.5-10), at 5-60 °C (optimally at 30-37 °C); salt tolerance (up to 3M NaCl)	Seawater/Sediment samples (North Sea)	https://www.pazy.eu/doku.php?id=pla
Rhodopseudomonas palustris CGA009, RPA1511, esterase	carboxylesterase (EC 3.1.1.1)	Active at pH 7-11 (optimally at pH 10), at 5-80 °C (optimally at 55-60 °C); salt tolerance (up to 4M NaCl)	Various sources: swine waste lagoons, earth- worm droppings, marine coastal sediments and pond water	https://www.pazy.eu/doku.php?id=pla
Lederbergia (Bacillus) lentus, protease, Subtilisin, 'Savinase'	peptidases (EC 3.4.-)	No	Soil	https://www.pazy.eu/doku.php?id=pla
Lederbergia (Bacillus) lentus, protease, Subtilisin BL	peptidases (EC 3.4.-)	No	Soil	https://www.pazy.eu/doku.php?id=pla
Lederbergia (Bacillus) subtilis, protease, Subtilisin,	peptidases (EC 3.4.-)	No	Soil	https://www.pazy.eu/doku.php?id=pla
Lederbergia (Bacillus) licheniformis, protease, Subtilisin, subC	peptidases (EC 3.4.-)	No	Various sources: aquatic, soil, animal, plant	https://www.pazy.eu/doku.php?id=pla
Thermobifida (Thermomonospora) alba AHK119, Est119		Active at pH 5.5-7.0 (optimally at pH 6), at 20-75 °C (optimally at 45-55 °C)	Composted polyester films	https://www.pazy.eu/doku.php?id=pla
Laceyella sacchari LP175, LP175	serine endopeptidases (EC 3.4.21.-)	Optimal activity at pH 9, at 60 °C	Forest soil	https://www.pazy.eu/doku.php?id=pla
Thermobifida cellulosilytica, Thc_cut1	cutinase (EC 3.1.1.74)	Active at 50 °C	Overheated manure compost	https://www.pazy.eu/doku.php?id=pla
Thermobifida cellulosilytica, Thc_cut2	cutinase (EC 3.1.1.74)	Active at 50 °C	Overheated manure compost	https://www.pazy.eu/doku.php?id=pla
Metagenome
Marine metagenome, esterase, MGS0109 (KC986401)	carboxylesterase (EC 3.1.1.1)	Active at 5-50 °C (optimally at 30 °C); Salt tolerance (up to 0.5 M NaCl/KCl)	Metagenomic libraries from enrichment cultures established using seawater samples collected from oil-contaminated areas in the Barents Sea	https://www.pazy.eu/doku.php?id=pla
Marine metagenome, esterase, MGS0010 (KF801579)	carboxylesterase (EC 3.1.1.1)	Active at 5-60 °C (optimally at 30 °C); Salt tolerance (up to 3.5 M NaCl/KCl)	Metagenomic libraries from enrichment cultures established using phenanthrene + pyrene amended seawater samples from the Mediterranean Sea	https://www.pazy.eu/doku.php?id=pla
Marine metagenome, esterase, MGS0105 (KC986400)	carboxylesterase (EC 3.1.1.1)	Active at 5-60 °C (optimally at 15-20 °C); Salt tolerance (up to 0.7 M NaCl and 2 M KCl)	Metagenomic libraries from enrichment cultures established using seawater samples collected from oil-contaminated areas in the Barents Sea	https://www.pazy.eu/doku.php?id=pla
Marine metagenome, esterase (identical to the putative carboxyl esterases ABO_1197 from the ubiquitous moderately halophilic marine γ-proteobacterium Alcanivorax borkumensis)	carboxylesterase (EC 3.1.1.1)	Active at 5-40 °C (optimally at 30 °C); Salt tolerance (up to 3.5 M NaCl/KCl)	Metagenomic libraries from enrichment cultures established using seawater samples collected from oil-contaminated areas in the Barents Sea	https://www.pazy.eu/doku.php?id=pla
Marine metagenome, esterase (identical to the putative carboxyl esterases ABO_1251from the ubiquitous moderately halophilic marine γ-proteobacterium Alcanivorax borkumensis)	carboxylesterase (EC 3.1.1.1)	Active at 5-60 °C (optimally at 35 °C); Salt tolerance (up to 3.5 M NaCl/KCl)	Metagenomic libraries from enrichment cultures established using seawater samples collected from oil-contaminated areas in the Barents Sea	https://www.pazy.eu/doku.php?id=pla
Metagenome clone MGS0084	carboxylesterase (EC 3.1.1.1)	Active at 5-60 °C (optimally at 20-25 °C); Retained almost 50% of maximal activity at 5 °C; Salt tolerance (up to 2 M NaCl/KCl)	MT Haven sunken shipwreck, tar samples, Arenzano harbour, Ligurian Sea, Genoa (Italy)	https://www.pazy.eu/doku.php?id=pla
Metagenome clone MGS0156	carboxylesterase (EC 3.1.1.1)	Active at 5-60 °C (optimally at 35-40 °C), a tpH 2-11 (optimally at pH 10.5); Retained approximately 20% of maximal activity at 5 °C; Salt tolerance (up to 2.5 M NaCl and 3 M KCl)	Anaerobic sludge granules from paper mill	https://www.pazy.eu/doku.php?id=pla
Metagenome clone GEN0105	carboxylesterase (EC 3.1.1.1)	Active at 5-70 °C (optimally at 35 °C), at pH 4-10.5; Retained approximately 20% of maximal activity at 5 °C; Salt tolerance (up to 2 M NaCl)	Anaerobic urban waste degrading facility	https://www.pazy.eu/doku.php?id=pla
PlaM4, depolymerase	carboxylesterase (EC 3.1.1.1)	Optimal activity at pH 7, at 70 °C	Poly(lactic acid) disks buried in compost	https://www.pazy.eu/doku.php?id=pla
PlaM7, depolymerase	carboxylesterase (EC 3.1.1.1)	No	Poly(lactic acid) disks buried in compost	https://www.pazy.eu/doku.php?id=pla
PlaM9, depolymerase	carboxylesterase (EC 3.1.1.1)	No	Poly(lactic acid) disks buried in compost	https://www.pazy.eu/doku.php?id=pla
Eukaryota
Aspergillus oryzae ATCC42149, cutinase CutL1	cutinase (EC 3.1.1.74)	Optimal activity at pH 9, at 40-55 °C	Cereal	https://www.pazy.eu/doku.php?id=pla
Cryptococcus sp. S-2, CLE, cutinase	cutinase (EC 3.1.1.74)	No	Air	https://www.pazy.eu/doku.php?id=pla
Cryptococcus (Saitozyma flava) flavus GB-1, CLE		No	Rice husks	https://www.pazy.eu/doku.php?id=pla
Cryptococcus magnus, CmCut		No	Midgut of stag beetle larvae	https://www.pazy.eu/doku.php?id=pla
Paraphoma sp. B47-9		No (Optimal activity at pH 7.2, at 45 °C)	Barley phylloplane	https://www.pazy.eu/doku.php?id=pla
Pseudozyma (Candida) antarctica , PaE, PaCLE1		No (Optimal activity at pH 9-10, at 40 °C)	Lake sediment (Antarctica)	https://www.pazy.eu/doku.php?id=pla

## Sheet: PHA_Polyhydroxyalkanoates
Microbial host/enzyme/gene	Enzyme type (EC number)	Enzyme activity under extreme conditions	Source	References
Pseudomonadota (Proteobacteria)
Cuprivadus necator ATC17699, DSM428 (Ralstonia eutropha, Wautersia eutropha), phaZ 1-7				https://www.pazy.eu/doku.php?id=pha
-Phaz1	poly(3-hydroxybutyrate) depolymerase (EC 3.1.1.75)	No (Active at pH 8.5-10, at 30 °C)	Sludge from Weende-Quelle	https://www.pazy.eu/doku.php?id=pha
-PhaZ2	poly(3-hydroxybutyrate) depolymerase (EC 3.1.1.75)	Unspecified	Sludge from Weende-Quelle	https://www.pazy.eu/doku.php?id=pha
-PhaZ3	poly(3-hydroxybutyrate) depolymerase (EC 3.1.1.75)	Unspecified	Sludge from Weende-Quelle	https://www.pazy.eu/doku.php?id=pha
-PhaZ4	poly(3-hydroxybutyrate) depolymerase (EC 3.1.1.75)	Unspecified	Sludge from Weende-Quelle	https://www.pazy.eu/doku.php?id=pha
-PhaZ5	poly(3-hydroxybutyrate) depolymerase (EC 3.1.1.75)	Unspecified	Sludge from Weende-Quelle	https://www.pazy.eu/doku.php?id=pha
-PhaZ6 (PhaZd1)	poly(3-hydroxybutyrate) depolymerase (EC 3.1.1.75)	No	Sludge from Weende-Quelle	https://www.pazy.eu/doku.php?id=pha
-PhaZ7 (PhaZd2)	poly(3-hydroxybutyrate) depolymerase (EC 3.1.1.75)	No	Sludge from Weende-Quelle	https://www.pazy.eu/doku.php?id=pha
-PhaY1 (PhaZ2)	hydroxybutyrate-dimer hydrolase (EC 3.1.1.22)	Unspecified	Sludge from Weende-Quelle	https://www.pazy.eu/doku.php?id=pha
-PhaY2	3-hydroxybutyrate-oligomer hydrolase (EC:3.1.1.-)	Unspecified	Sludge from Weende-Quelle	https://www.pazy.eu/doku.php?id=pha
Alcaligenes faecalis, PhaZAfa	poly(3-hydroxyoctanoate) depolymerase (EC 3.1.1.76)	No (Active at oH 7.4, at 37 °C)	Activated sludge from the Toba sewage-treatment plant, Kyoto, Japan	https://www.pazy.eu/doku.php?id=pha
Paucimonas lemoignei, PhaZ7	poly(3-hydroxybutyrate) depolymerase (EC 3.1.1.75)	No	Soil/meadow/compost	https://www.pazy.eu/doku.php?id=pha
Paucimonas lemoignei, PhaZ5	Poly(3-hydroxybutyrate) depolymerase A	Unspecified	Soil/meadow/compost	https://www.pazy.eu/doku.php?id=pha
Pseudomonas stutzeri JCM 10168 = YM1006, PhaZst	poly(3-hydroxybutyrate) depolymerase (EC 3.1.1.75)	No (Active at pH 7.4, at 37 °C)	Seawater	https://www.pazy.eu/doku.php?id=pha
Commamonas acidivorans, YM1609, PhaZCac		No (Active at pH 7.4, at 37 °C)	Lake Biwa	https://www.pazy.eu/doku.php?id=pha
Pseudomonas putida KT2442, PhaZ		No (Active at pH 7.5, at 37 °C)	Soil	https://www.pazy.eu/doku.php?id=pha
Eukaryota				https://www.pazy.eu/doku.php?id=pha
Talaromyces (Penicilium) funiculosus	poly(3-hydroxybutyrate) depolymerase (EC 3.1.1.75)	No	Radio set	https://www.pazy.eu/doku.php?id=pha

## Sheet: PBAT_Polybutylene adipate terep
Microbial host/enzyme/gene	Enzyme type (EC number)	Enzyme activity under extreme conditions	Source	References
Bacteria
Pseudomonas pseudoalcaligenes, PpEst (tesA)	arylesterase (EC 3.1.1.2)	Active at 25-90 °C (optimally at 65 °C on PBAT), at pH 7-8	Sinus discharge	https://www.pazy.eu/doku.php?id=pbat
Rhodococcus fascians NKCM2511, PBATHRF , pbath	PBAT hydrolase	Highest activity at 4–30 °C	Soil	https://www.pazy.eu/doku.php?id=pbat
Clostridium hathewayi DSM-13479, Chath_Est1	esterase (EC 3.1.-.-)	No (Active at pH 7, at 37 °C)	Human faeces	https://www.pazy.eu/doku.php?id=pbat
Thermobifida fusca, TfH		Optimal activity at 65-70 °C, at pH 6-7	Mushroom compost	https://www.pazy.eu/doku.php?id=pbat
Thermobifida cellulosilytica, Thc_cut1	cutinase (EC 3.1.1.74)	Active at pH 7, at 50 °C	Overheated manure compost	https://www.pazy.eu/doku.php?id=pbat
Thermobifida alba, Est1	carboxylesterase (EC 3.1.1.1)	Unspecified	Composted polyester films	https://www.pazy.eu/doku.php?id=pbat
Thermobifida alba, Est119	carboxylesterase (EC 3.1.1.1)	Optimal activity at 50°C, at pH 6	Composted polyester films	https://www.pazy.eu/doku.php?id=pbat
Pelosinus fermentans DSM 17108, PFL1		Optimal activity at pH 7.5, ay 50 °C	Groundwater	https://www.pazy.eu/doku.php?id=pbat
Clostridium botulinum, Cbotu_EstA		Optimal activity at 50 °C	Soil	https://www.pazy.eu/doku.php?id=pbat
Clostridium botulinum, Cbotu_EstB		No	Soil	https://www.pazy.eu/doku.php?id=pbat
Bacillus pumilus, PBATHBp		No	Soil	https://www.pazy.eu/doku.php?id=pbat
Thermobacillus composti KWC4, Tcca	carboxylic ester hydrolase (3.1.1.-)	Active at 30-70 (optimally at 40 °C), at pH 5-9.5 (optimally at pH 7)	Composting reactor	https://www.pazy.eu/doku.php?id=pbat
Marinobacter sp., PLE629	Hydrolase (PETase-like)	No (Optimal activity at 30 °C)	Marine sediment	https://www.pazy.eu/doku.php?id=pbat
Marinobacter sp., PLE628	Hydrolase (PETase-like)	No (Optimal activity at 30 °C)	Marine sediment	https://www.pazy.eu/doku.php?id=pbat
Pseudomonas sp. JM16B3, jmPE13		Active at 25-55 °C (optimally at 34-37 °C), at pH 5.5-9 (optimally at pH 8)	Aquaculture water	https://www.pazy.eu/doku.php?id=pbat
Pseudomonas sp. JM16B3, jmPE14		Active at 25-60 °C (optimally at 34-37 °C), at pH 4-9 (optimally at pH 7.5)	Aquaculture water	https://www.pazy.eu/doku.php?id=pbat
Eukarya
Humicola insolens, HiC	cutinase (EC 3.1.1.74)	Active at at 50 °C	Hot spring	https://www.pazy.eu/doku.php?id=pbat

## Sheet: PBS_Polybutylene succinate
Microbial host/enzyme/gene	Enzyme type (EC number)	Enzyme activity under extreme conditions	Source	References
Bacteria
Acidovorax delafieldii Strain BS-3, PbsA	lipase	No (Active at 30 °C)	Soil	https://www.pazy.eu/doku.php?id=pbs
Fungi
Rhizopus delemar, Lipase	lipase	No (Active at 37 °C)	Unspecified	https://www.pazy.eu/doku.php?id=pbs
Aspergillus oryzae ATCC42149, cutinase CutL1	cutinase (EC 3.1.1.74)	Active at 20-65 °C (optimally at 40-50 °C), at pH 7-11 (optimally pH 9)	Cereal	https://www.pazy.eu/doku.php?id=pbs
Fusarium solani, FSC	cutinase (EC 3.1.1.74)	Optimal activity at pH 8, at 50 °C	Pea stem	https://www.pazy.eu/doku.php?id=pbs

## Sheet: NR_Natural rubber
Microbial host/enzyme/gene	Enzyme type (EC number)	Enzyme activity under extreme conditions	Source	References
Bacteria
Streptomyces sp. K30, Lcp, LCP_STRK3	b-Type Cytochrome (acts as an endo-type dioxygenase)	No	Soil	https://www.pazy.eu/doku.php?id=nr
Steroidobacter cummioxidans (Xanthomonas ) 35Y, RoxA	cytochrome c dioxygenase	No	Unknown	https://www.pazy.eu/doku.php?id=nr
Steroidobacter cummioxidans (Xanthomonas) 35Y, RoxB	cytochrome c dioxygenase	No	Unknown	https://www.pazy.eu/doku.php?id=nr
Rhizobacter gummiphilus NS21, LatA	rubber oxygenase	No	Soil	https://www.pazy.eu/doku.php?id=nr
Streptomyces sp. AC04842, Lcp1	rubber oxygenase	No	Soil	https://www.pazy.eu/doku.php?id=nr
Streptomyces sp. AC04842, Lcp2	rubber oxygenase	No	Soil	https://www.pazy.eu/doku.php?id=nr
Microtetraspora sp. AC03309, Lcp1	rubber oxygenase	No	Soil	https://www.pazy.eu/doku.php?id=nr
Microtetraspora sp. AC03309, Lcp2	rubber oxygenase	No	Soil	https://www.pazy.eu/doku.php?id=nr
Dactylosporangium sp. AC04546	rubber oxygenase	No	Soil	https://www.pazy.eu/doku.php?id=nr
Gordonia polyisoprenivorans, Lcp1VH2	rubber oxygenase	No	Soil (rubber tree plantation)	https://www.pazy.eu/doku.php?id=nr
Gordonia polyisoprenivorans, Lcp2VH2	rubber oxygenase	No	Soil (rubber tree plantation)	https://www.pazy.eu/doku.php?id=nr
